# Supplementary material for: Collective hydrodynamic transport of magnetic microrollers
Source: Royal Society of Chemistry journal article supplement (doi:10.1039/d1sm00653c), 2021-01-01
Supplement: d1sm00653c1.pdf [file d1sm00653c1.pdf]

Supporting Information for the article:

**Collective hydrodynamic transport of magnetic microrollers.**

*Gaspard Junot*<sup>a</sup>, *Andrejs Cebers*,<sup>b</sup> and *Pietro Tierno*<sup>a c d\*</sup>

<sup>a</sup> Departament de Física de la Matèria Condensada, Universitat de Barcelona, Av. Diagonal 647, 08028, Barcelona, Spain.

<sup>b</sup> MMML Lab, Department of Physics, University of Latvia, Jelgavas-3, Riga, LV-1004, Latvia.

<sup>c</sup> Universitat de Barcelona Institute of Complex Systems (UBICS), Universitat de Barcelona, Barcelona, Spain.

<sup>d</sup> Institut de Nanociència i Nanotecnologia, IN2UB, Universitat de Barcelona, Av. Diagonal 647, 08028, Barcelona, Spain.

\* E.mail: [ptierno@ub.edu](mailto:ptierno@ub.edu)

## **SUPPORTING VIDEO FILES.**

With the article there are 3 videoclips in support of Fig.3(b).

**VideoS1**(.WMV): This videoclip shows the propulsion of the hematite surface micro rollers when driven by a rotating magnetic field with frequency  $f = 10$  Hz and amplitude  $H = 4400$  A m<sup>-1</sup>. The videoclip corresponds to the left panel in Fig.3(b) of the article.

**VideoS2**(.WMV): This videoclip shows the propulsion of the hematite surface micro rollers when driven by a rotating magnetic field with frequency  $f = 100$  Hz and amplitude  $H = 4400$  A m<sup>-1</sup>. The videoclip corresponds to the middle panel in Fig.3(b) of the article.

**VideoS3**(.WMV): This videoclip shows the propulsion of the hematite surface micro rollers when driven by a rotating magnetic field with frequency  $f = 300$  Hz and amplitude  $H = 4400$  A m<sup>-1</sup>. The videoclip corresponds to the right panel in Fig.3(b) of the article.
